# Supplementary material for: Distinguishing Driver and Passenger Mutations in an Evolutionary History Categorized by Interference
Source: Oxford University Press journal article supplement (doi:10.1534/genetics.111.133975), 2011-09-08
Supplement: figures1.pdf [file figures1.pdf]

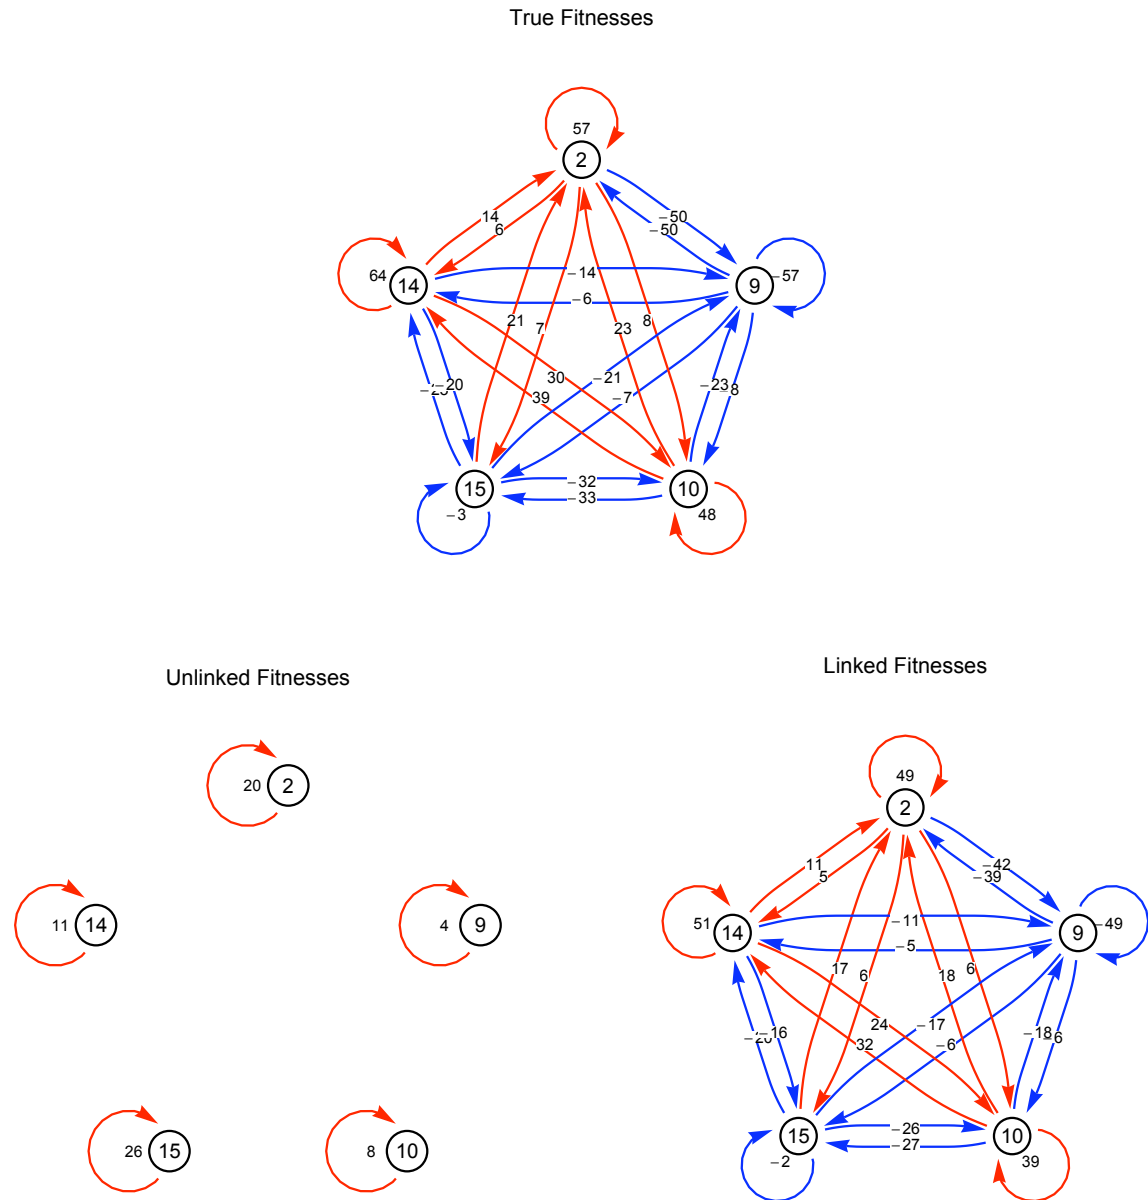

**Figure S1** Selection and inter-locus effects in a model system. Details of selection coefficients in the system represented in Figure 2 of the main text. Red edges indicate positive selection and inter-locus effects, while blue edges indicate negative selection and inter-locus effects. The data represented is identical to that in the graphs of Figure 2, albeit with numerical values included. A close fit between the true selection and the inferred selection using linked method can be observed.
