# Supplementary material for: Distinguishing Driver and Passenger Mutations in an Evolutionary History Categorized by Interference
Source: Oxford University Press journal article supplement (doi:10.1534/genetics.111.133975), 2011-09-08
Supplement: figures3.pdf [file figures3.pdf]

Selection  $2N\sigma = 50$ , Sample depth  $n_g=100$ , Linked

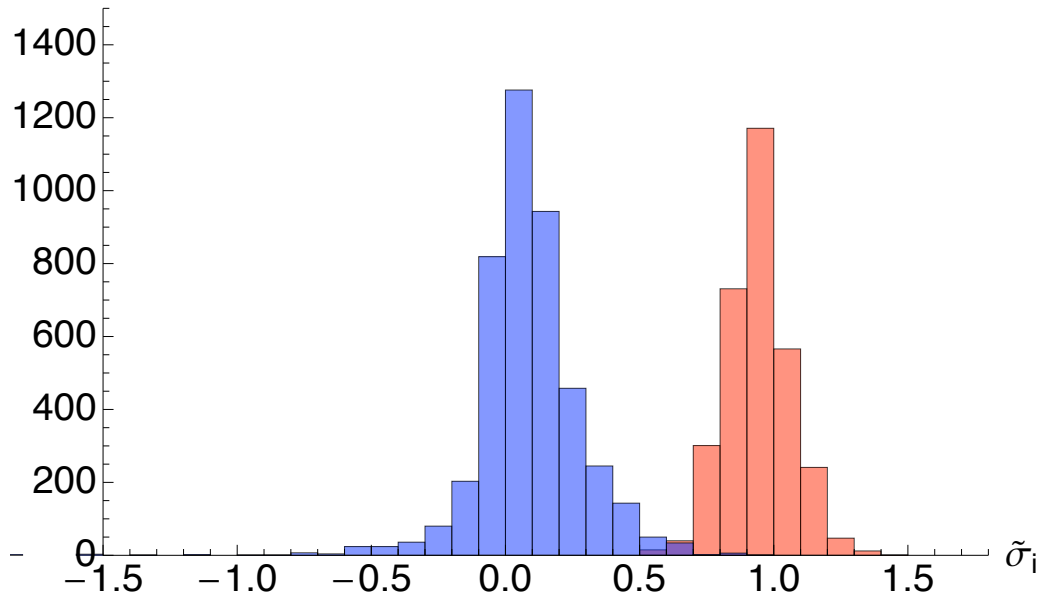

2Selection  $2N\sigma = 50$ , Sample depth  $n_g=100$ , Linked

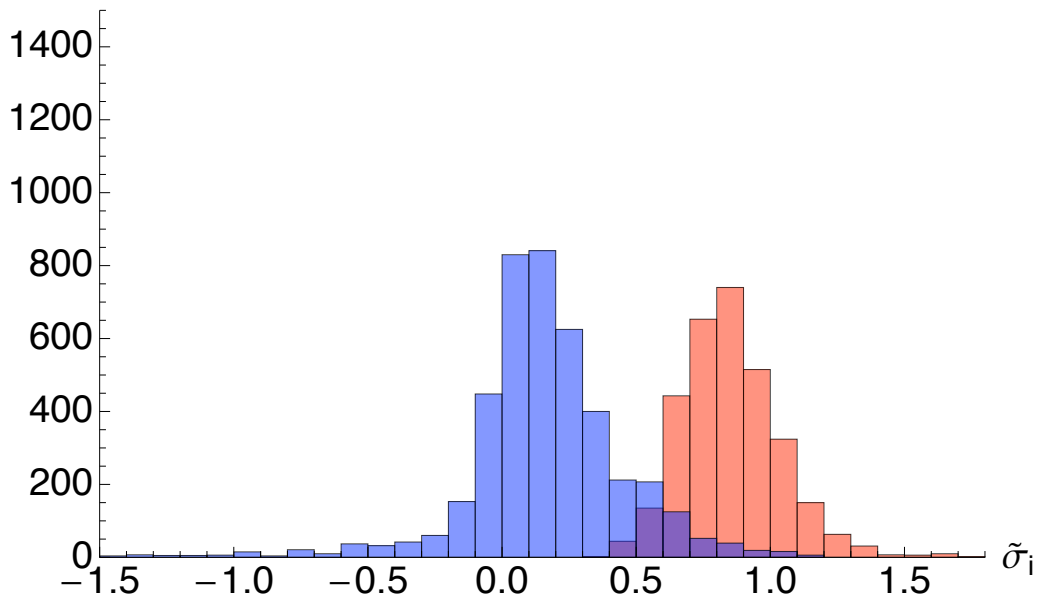

**Figure S3** Selection coefficients inferred from lower sampling levels had a greater variance. Inferred selection coefficients, in units of  $2N\sigma$ , for driver (red), and passenger (blue) selection coefficients for  $T = 500$ ,  $dt_s = 100$ , and  $n_g$  equal to 100 and 5 respectively. The greater variance at lower sampling is evident. Outlier passenger coefficients falling lower than the range shown are excluded - these comprise 3.5% of coefficients at  $n_g = 5$  and 0.3 % of passenger coefficients at  $n_g = 100$ .
