# Supplementary material for: Distinguishing Driver and Passenger Mutations in an Evolutionary History Categorized by Interference
Source: Oxford University Press journal article supplement (doi:10.1534/genetics.111.133975), 2011-09-08
Supplement: figures4.pdf [file figures4.pdf]

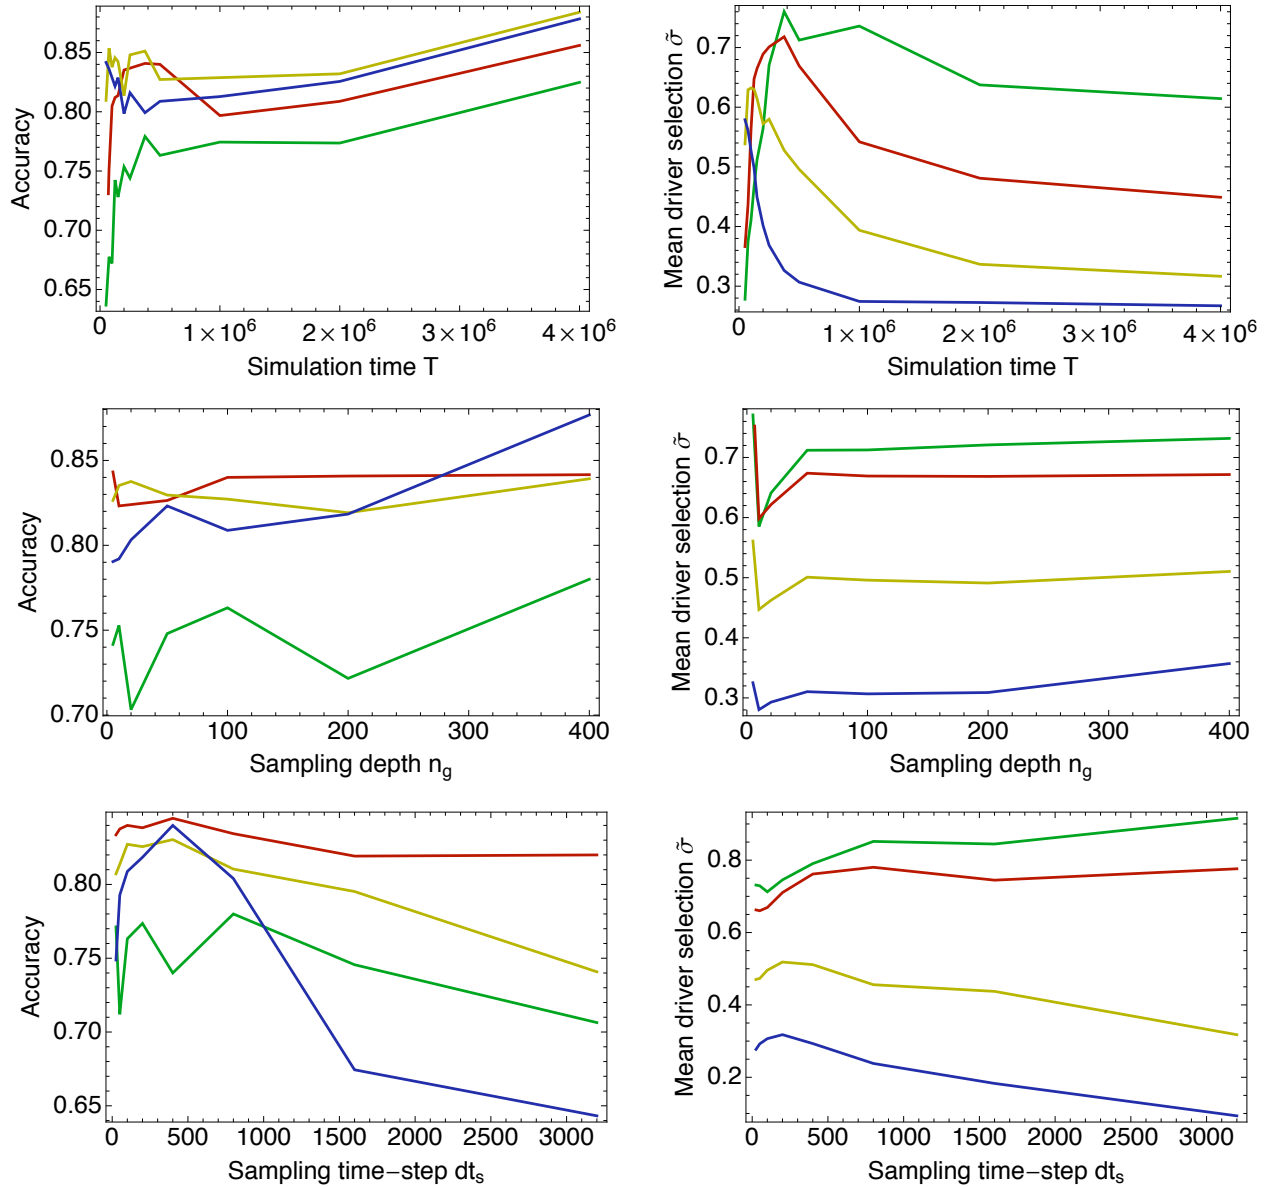

**Figure S4** Performance of the unlinked method under varying data collection scenarios. Variation in the accuracy of the method in identifying driver and passenger loci (left column) and in the reproduction of selection coefficients, in units of  $2N\sigma$ , for driver loci (right column). Default parameters were  $T = 5 \times 10^5$ ,  $n_g = 100$ , and  $dt_s = 100$ . Top: Variation in performance under different values of  $T$ , the number of generations sampled. Middle: Variation in performance under different values of  $n_g$ , the number of individuals sampled at each time point. Bottom: Variation in performance given different values of  $dt_s$ , the time between sample points. Data is plotted for values of  $2N\sigma$  equal to 100 (blue), 50 (red), 20 (yellow) and 10 (green). Accuracy values are averaged over simulations with 5, 10, 15, 20, and 25 drivers, while mean sigma values are averaged over simulations with 5, 10, 15, 20, 25, and 50 drivers.
