# Supplementary material for: Distinguishing Driver and Passenger Mutations in an Evolutionary History Categorized by Interference
Source: Oxford University Press journal article supplement (doi:10.1534/genetics.111.133975), 2011-09-08
Supplement: files1.pdf [file files1.pdf]

## Supporting Information

**Calling trajectories** The resetting of fixed mutant alleles led to difficulties in calling trajectories which would not be encountered with biological sequence data, particularly in identifying the end of a trajectory. While, in the identification of the initial point of a trajectory, ignoring sampling effects makes for a pragmatic solution, the time of fixation or death of a polymorphism is more difficult to pinpoint. Indeed, errors at this point can lead to the spurious identification of new trajectories, leading to obvious problems in the later analysis. Here, a cutoff number of observations,  $c$ , was defined as

$$c = \max\{300/n_g, 8\} \quad (1)$$

In the case of an apparent death of a polymorphism at some locus  $i$ , indicated by a zero sample frequency, the frequencies  $\hat{q}_i^1(t_k)$  at the subsequent  $c - 1$  samples were examined. If a non-zero sample frequency was observed in any of these samples, it was assumed that the apparent death was an artefact of limited sampling, and the polymorphism was assumed to be in existence across the intervening time-points. If no non-zero sample frequencies were observed, the apparent observation of the death of the wild-type allele was assumed to reflect a death in the underlying population. The value of 300 used in the definition of  $c$  here reflects the number of observations required to be 95% certain that a polymorphism does not exist at a frequency greater than 1% in the underlying population. In the case of an apparent fixation in the population, marked by a sample frequency value of 1, a slightly different process was required, due to the delayed return in the simulation of fixed mutant alleles to the wild type. Subsequent to an apparent fixation, the allele frequencies at the locus were observed

as above. If a polymorphic frequency between 0 and 0.5 was observed at that locus, it was assumed that the fixed mutant allele had been returned to the wild-type, and a fixation was recorded at the first time of apparent fixation in the locus. If a polymorphic frequency greater than 0.5 was observed at the locus, it was assumed that the initial observation of fixation arose through limited sampling, no fixation having occurred in the intervening time. We note that, at large values of  $dt_s$ , this method is not error-free in the histories of polymorphisms called at different loci, leading to a potential worsening of the results reported in the main text for long sampling times. However, when the method is extended to a biological system, with binary alleles replaced by codons, the mutation of a fixed allele back to wild-type would become easily distinguishable from a mutation to a new, third allele at the same locus.
